# Supplementary material for: Effects of silver sulfide nanoparticles on the microbial community structure and biological activity of freshwater biofilms
Source: Royal Society of Chemistry journal article supplement (doi:10.1039/c8en00480c), 2018-01-01
Supplement: c8en00480c1.pdf [file c8en00480c1.pdf]

## **Supplemental material**

### **Effects of Silver Sulfide Nanoparticles on the Microbial Community Structure and Biological Activity of Freshwater Biofilms**

Songqi Liu, Chao Wang, Jun Hou\*, Peifang Wang, Lingzhan Miao\*, Tengfei Li

Key Laboratory of Integrated Regulation and Resources Development on Shallow  
Lakes of Ministry of Education, College of Environment, Hohai University, Nanjing  
210098, People's Republic of China

\*Corresponding author.

College of Environment, Hohai University, 1 Xikang Road, Nanjing 210098, China

Tel.: +86-25-83787332; fax: +86-25-83787332.

E-mail: hhuhjyhj@126.com (Jun Hou),

mlz1988@126.com (Lingzhan Miao)

### **Test S1. The incubation tank and methods**

A dynamic ecological water tank (made using polymethyl methacrylate) was used in our study ( Figure S2), which mainly included four tanks, a pump, and a flow meter. The bottom tank was for water storage, and the volume of retention reservoir was 1 m<sup>3</sup>. The incubation tank has three parallel oblong sinks. Each sink measured 2.4 m × 0.3 m × 0.4 m. The flow velocity and water level in the sinks were controlled by a valve and a pump, facilitating circulation. The water used for the biofilm incubation was collected from Xuanwu Lake, Nanjing, China, and the parameters are listed in Table S1. The incubator tank was maintained at a temperature of 25 ± 0.5°C, and light was provided by halogen lamps (90–110 μmol/m<sup>2</sup>/s, light:dark = 12:12 h). During the formation of biofilm, the velocity and depth of water in the sink were 3.2 ± 0.8 cm/s and 0.3 m, respectively. Additionally, WC medium was added every 5 days to maintain normal levels of nutrition. Biofilms were incubated for 2 months to form stabilized and mature biofilms on the surface of polymethyl methacrylate. The biofilms were removed using a sterile brush and then used for subsequent experiments.

### **Test. S2. Extraction of EPS from biofilms**

The soluble EPS (sEPS), loosely bound EPS (LB-EPS) and tightly bound EPS (TB-EPS) in the biofilm were extracted. About 0.5 g fresh biofilms were collected from the flask, mixed with 20 ml 0.05% (w/w) NaCl solution in a 50 ml tube, and then centrifuged at 3000g for 10 min. The supernatants were collected as the sEPS. The pellet at bottom was re-suspended in a 0.05% (w/w) NaCl solution to form 20 ml suspensions, followed by sonication at 20 kHz for 2 min. Next, the suspensions were homogenized and centrifuged at 8000g for 10 min. The liquid was poured out carefully as the LB-EPS. The residual pellet was re-suspended again with 0.05% (w/w) NaCl solutions at their initial volume. The suspension was heated at 70°C for 30 min and subsequently centrifuged at 12000g for 20 min, and the supernatant was collected carefully as the TB-EPS. All kinds of collected EPS were filtered through 0.45  $\mu$ m acetate cellulose membranes for the following measurements.

### **Test. S3. DNA extraction, PCR amplification, Illumina high-throughput sequencing and data analysis**

Biofilm samples were collected carefully and were stored at -80 °C until DNA extraction. Genomic DNA was extracted using the E.Z.N.A.® Tissue DNA kit (Omega Bio-tek, Norcross, GA, U.S.) according to the manufacturer's instructions. The concentrations and purities (A260/A280 ratio > 1.5) of the extracted DNA samples were analyzed by a NanoDrop ND-2000 (Thermo Fisher Scientific, USA). The identities of 16S rRNA genes were confirmed using 515F and 907R primers: PCR amplification was carried out in triplicate using the AxyPrep DNA Gel Extraction Kit (Axygen Biosciences, Union City, CA, U.S.) according to the manufacturer's instructions and quantified using QuantiFluor™ -ST (Promega, U.S.). The purified amplicons were sequenced on an Illumina MiSeq platform, which was performed at MAGIGENE Biotech Co., Ltd (Guangzhou, China). (Zhou et al., 2016; Miao et al., 2018)

The raw data obtained from the Illumina MiSeq sequencing were saved as paired-end fastq. Raw fastq files were demultiplexed, quality-filtered using QIIME (version 1.17, <http://qiime.org/>). The amplicons with sequences shorter than 200 bps and of low quality (quality score < 25) were removed. After removing the barcodes and primers, the normalized samples were individually classified and analyzed by the RDP (Ribosomal Database Project) database (<http://rdp.cme.msu.edu/>). The OTU table building procedures were used USEARCH for quality trimming and OTU-clustering. The rarefaction curve was constructed by random sampling for all the

sequences, which can be used to compare the species diversity between different samples. Relative abundance (%) of individual taxa within each community was estimate by comparing the number of sequences assigned to a specific taxon versus the number of total sequences obtained for that sample. The minimum number of quality sequences per community across all of the samples was estimated, and the alpha-diversity (e.g., Chao1, Shannon, Simpson and observed species) and beta-diversity (UniFrac metrics) were based on a subset of randomly selected sequences from each sample, which according to the minimum number of quality sequences.

**Reference:**

Zhou, S.L., Huang, T.L., Zhang, C.H., Fang, K.K., Xia, C., Bai, S.Y., Zeng, M.Z., Qiu, X.P., 2016. Illumina MiSeq sequencing reveals the community composition of NirS-Type and NirK-Type denitrifiers in Zhoucun reservoir—a large shallow eutrophic reservoir in northern China. RSC Advances, 6(94), 91517-91528.

**Table S1.** Parameters of collected waters

| parameter                                           |           |
|-----------------------------------------------------|-----------|
| pH                                                  | 7.5±0.32  |
| Total nitrogen (TN)<br>(mg·L <sup>-1</sup> )        | 1.44±0.12 |
| Total phosphorous (TP)<br>(mg·L <sup>-1</sup> )     | 2.01±0.30 |
| PO <sub>4</sub> <sup>3-</sup> (mg·L <sup>-1</sup> ) | <0.038    |
| CO <sub>3</sub> <sup>2-</sup> (mg·L <sup>-1</sup> ) | <1.59     |
| NO <sub>3</sub> <sup>-</sup> (mg·L <sup>-1</sup> )  | 0.68±0.11 |
| NH <sub>4</sub> <sup>+</sup> (mg·L <sup>-1</sup> )  | 0.46±0.08 |

**Table S2.** WC Medium Recipe

| parameter                                           |         |
|-----------------------------------------------------|---------|
| NaNO <sub>3</sub>                                   | 1 mM    |
| CaCl <sub>2</sub> ·2H <sub>2</sub> O                | 0.25 mM |
| MgSO <sub>4</sub> ·7H <sub>2</sub> O                | 0.15 mM |
| NaHCO <sub>3</sub>                                  | 0.15 mM |
| Na <sub>2</sub> SiO <sub>3</sub> ·9H <sub>2</sub> O | 0.1 mM  |
| K <sub>2</sub> HPO <sub>4</sub>                     | 0.05 mM |
| H <sub>3</sub> BO <sub>3</sub>                      | 0.39 mM |
| WC Trace Elements Solution                          | 1 mL/L  |
| Vitamin B <sub>12</sub>                             | 1 mL/L  |
| Thiamine Vitamin Solution                           | 1 mL/L  |
| Biotin Vitamin solution                             | 1 mL/L  |

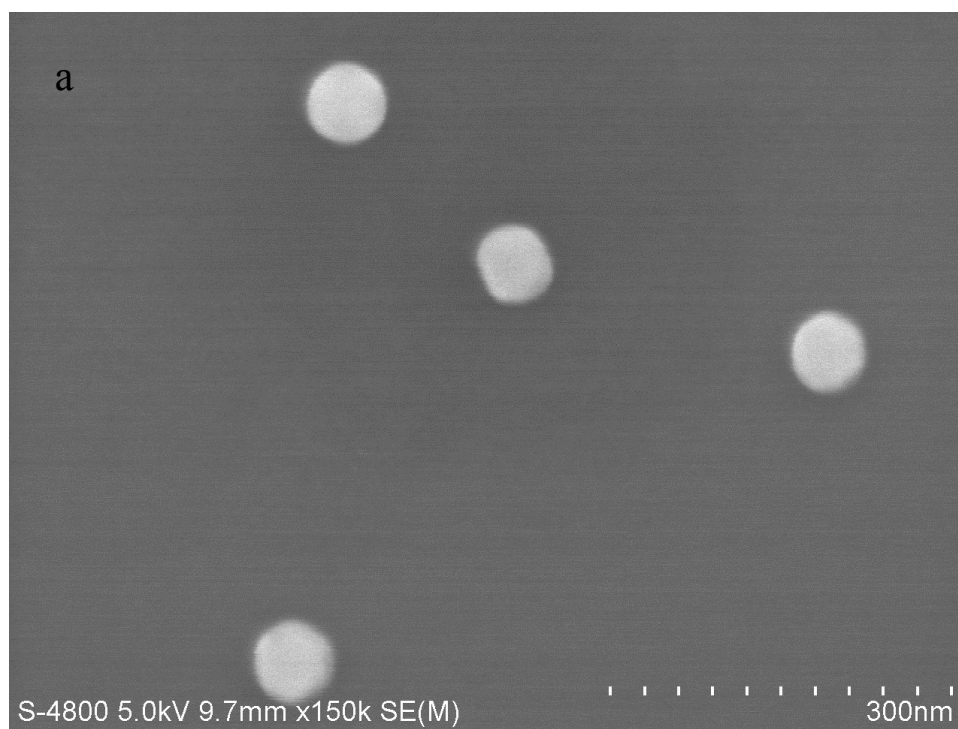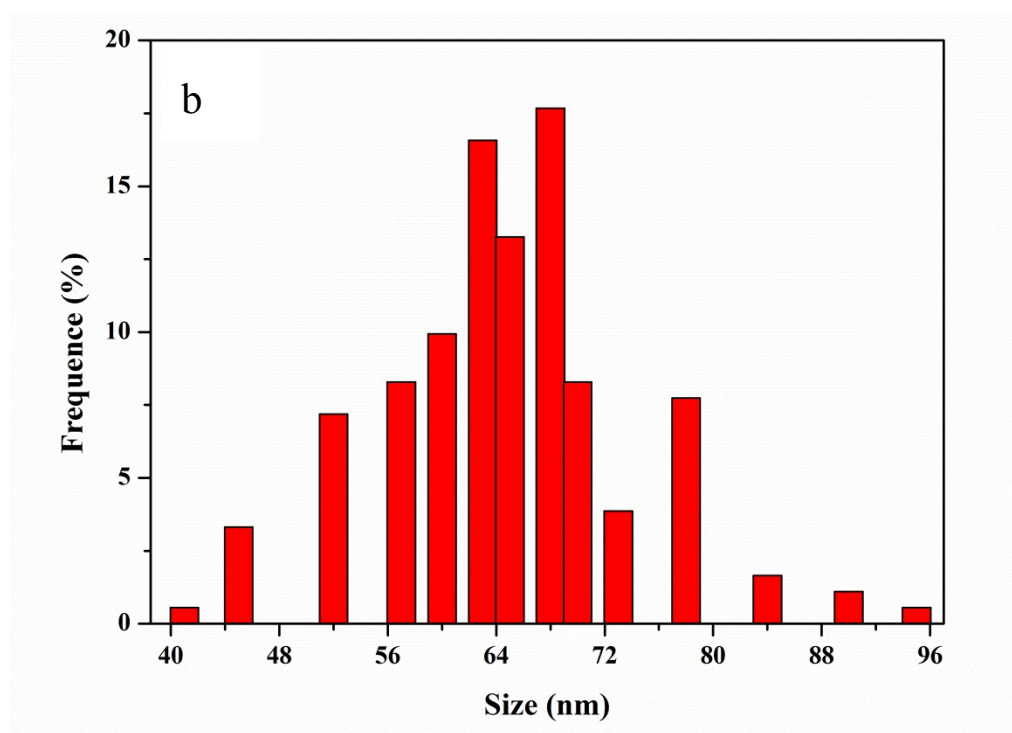

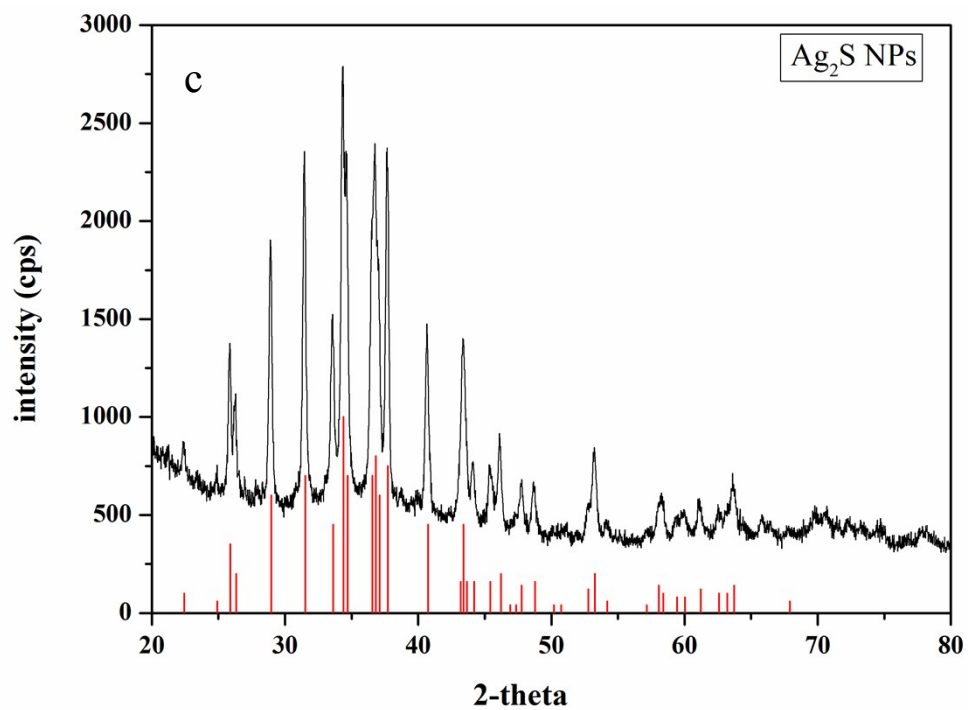

**Figure S1.** SEM images (a), size distribution of Ag<sub>2</sub>S NPs (b; n=181) and XRD patterns (c) of Ag<sub>2</sub>S NPs. Standard card patterns are shown in red, and measured ones in black

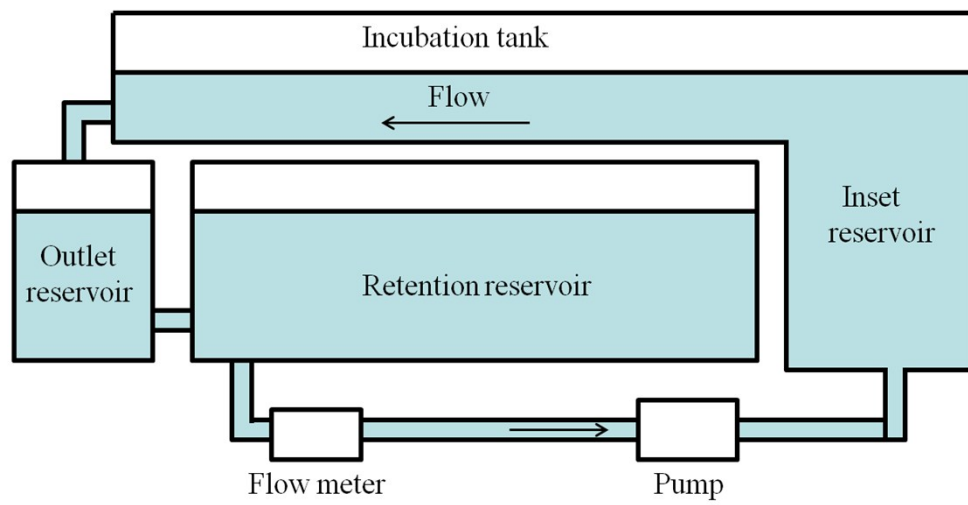

**Figure S2.** Sketch of the principal dynamic ecological water tank.

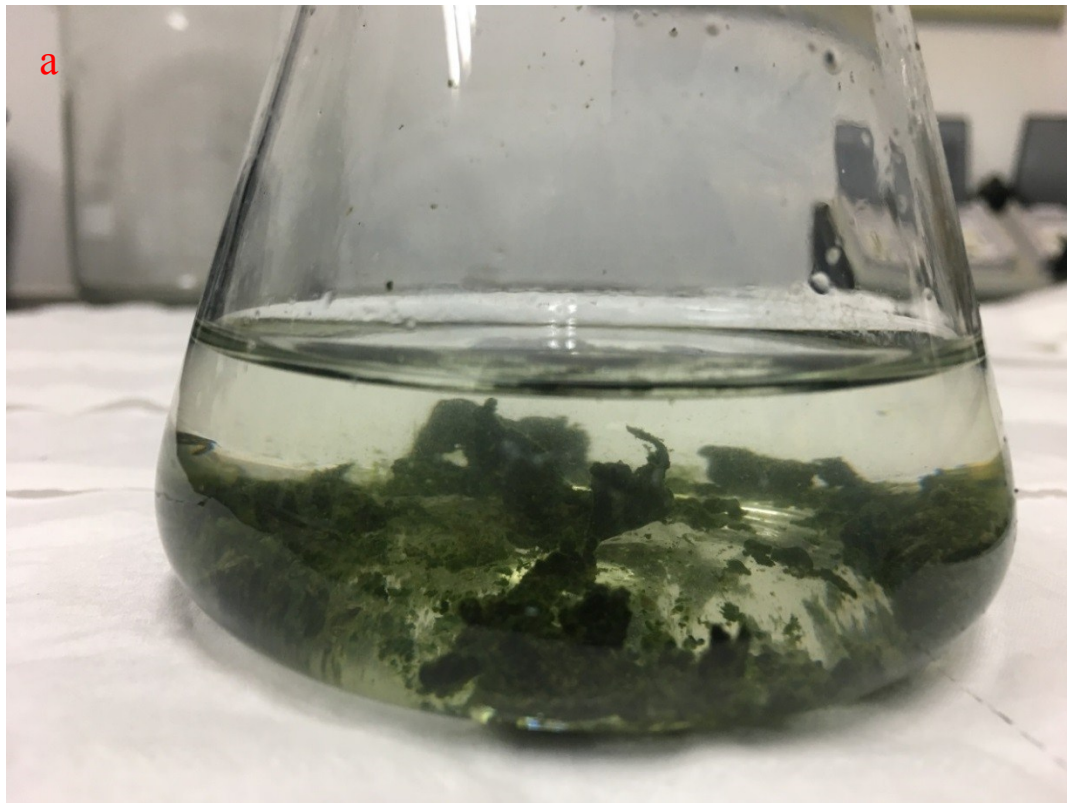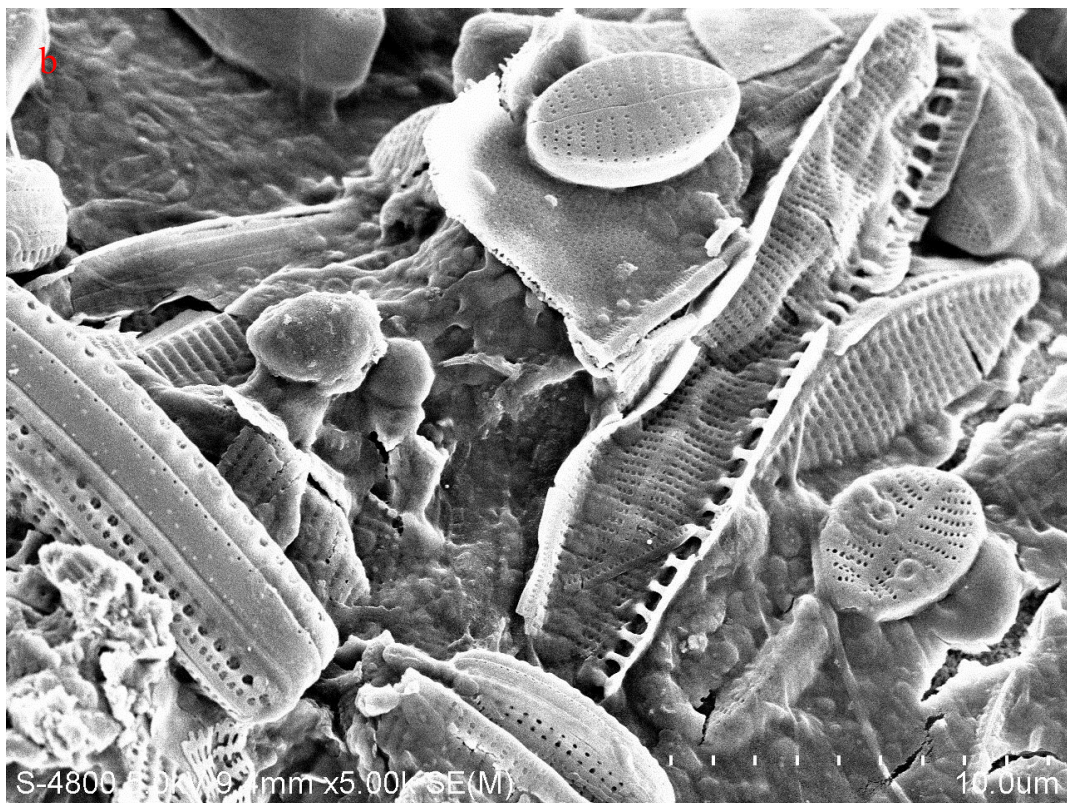

**Figure S3** The image of the exposed biofilms in Erlenmeyer flasks (a) and SEM image of the biofilms (b).

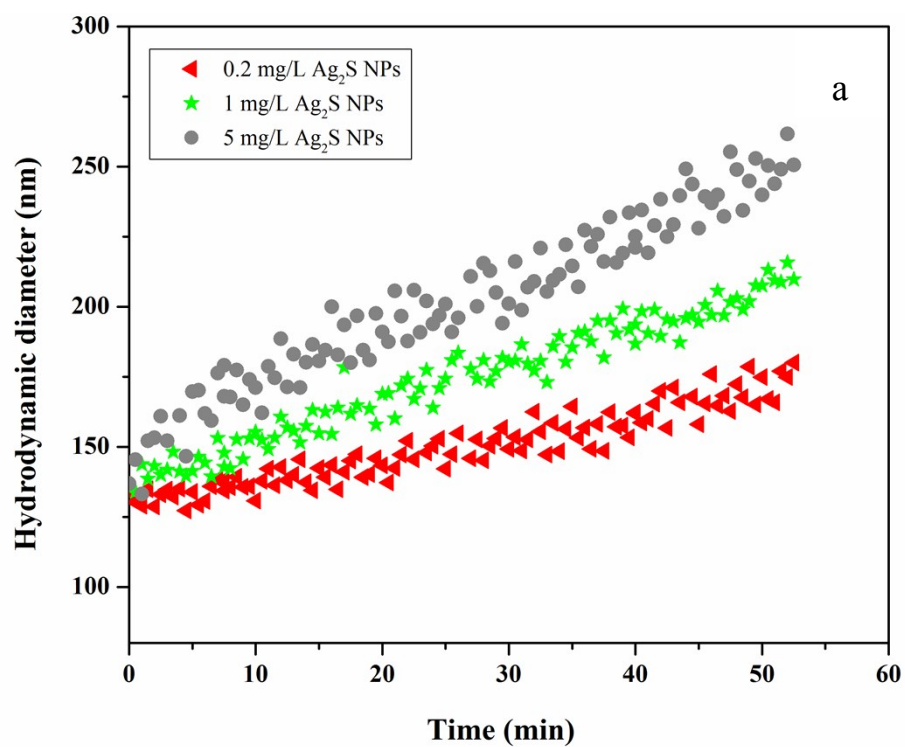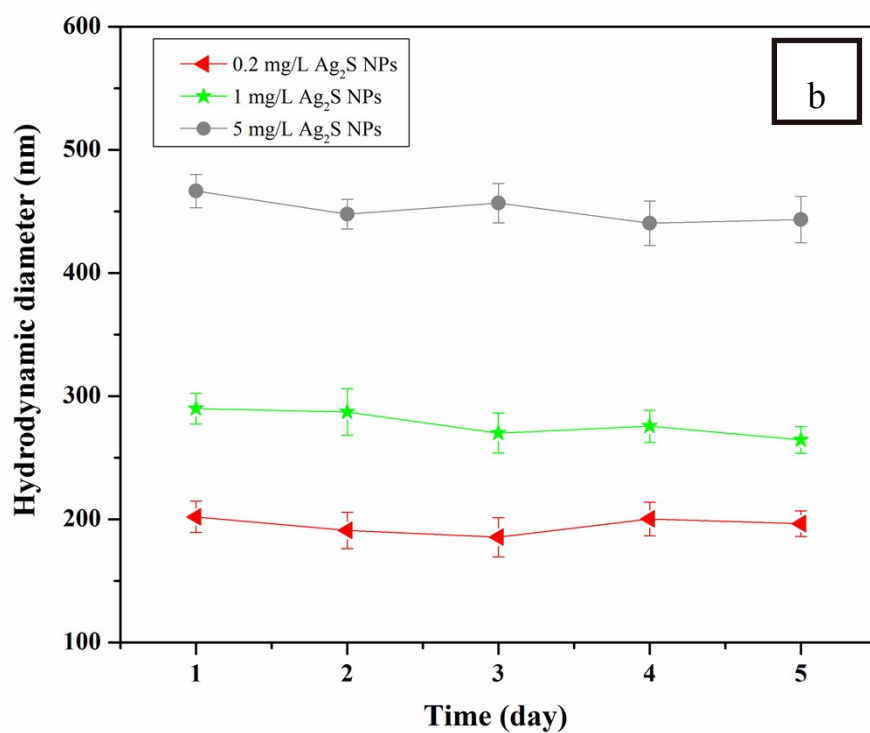

**Figure S4.** DLS of 0.2, 1 and 5 mg/L  $\text{Ag}_2\text{S}$  NPs in incubation water during 50 minutes (a) and 5d (b). The values for each sample in b are presented as averages with standard deviations ( $n=3$ ).
